# Supplementary material for: Synthesis and structure characterization of polymeric nanoporous microspheres with lignin
Source: Springer Nature journal article supplement (doi:10.1007/s10570-018-2009-7), 2018-08-24
Supplement: MOESM1 [file 16072396]

**Supplementary Material**

**Synthesis and structure characterization of polymeric nanoporous microspheres with lignin**

M. Goliszeka, B. Podkościelnaa*, K. Filaa, A. V. Riazanovab,c, S. Aminzadehb,c,

O. Sevastyanovab,c, V. M. Gun’kod

*a Faculty of Chemistry, Maria Curie-Skłodowska University, Maria Curie-Skłodowska Square 3, 20-031 Lublin, Poland*

*b Department of Fibre and Polymer Technology, KTH Royal Institute of Technology, Teknikringen 56-58, SE-100 44 Stockholm, Sweden*

*c WWSC Wallenberg Wood Science Center, Teknikringen 56-58, SE-100 44 Stockholm, Sweden*

*d Chuiko Institute of Surface Chemistry, 17 General Naumov Str., 03164 Kyiv, Ukraine*

Characterization of samples

The nitrogen adsorption-desorption isotherms were used to compute the pore size distributions (PSDs, differential *f*V(*R*) ~ d*V*p/d*R* and *f*S(*R*) ~ d*S*/d*R*) using a self-consistent regularization (SCR) procedure under non*-*negativity condition (*f*V(*R*) ≥ 0 at any pore radius *R*) at a fixed regularization parameter α = 0.01 (ProvencherSW1982) with a complex pore model including slit-shaped and cylindrical pores and voids between spherical particles packed in random aggregates the SCV model,(Gun'koVM2014) was used with modified (Nguyen C et al. 1999; Gun'ko VM et al. 2001) MND method for polymers. The differential PSDs (with respect to pore volume *f*V(*R*) ~ d*V*/d*R*, ∫*f*V(*R*)d*R* ~ *V*p) were re-calculated as incremental PSD (IPSD, ∑ΦV,i(*R*) = *V*p) for better view of the PSD at large values of *R*. The differential *f*S(*R*) functions were used to estimate the deviation (Δ*w*) of the pore shape from the model

(S1)

(Gun'ko VM et al. 2001). The *f*V(*R*) and *f*S(*R*) functions were also used to calculate contributions of nanopores (*V*nano and *S*nano at 0.35 nm <*R* ≤ 1 nm), mesopores (*V*meso and *S*meso at 1 nm <*R* ≤ 25 nm), and macropores (*V*macro and *S*macro at 25 nm <*R <*100 nm) to the total pore volume and specific surface area.

The average values of the pore radii were determined with respect to both pore volume and specific surface area, respectively, as the corresponding moments of the distribution functions

(S2)

(S3)

Note that calculations of the values of SSAXS give much larger values (e.g. 1146 and 1286 m2/g for samples 4 and 7, respectively) than those calculated from the nitrogen adsorption isotherms (see Table 4). This large difference is caused by a part of closed pores inaccessible for nitrogen molecules but visible in the SAXS measurement. Similar polymers, e.g. LiChrolut EN (Merck) composed of poly(ethylvinylbenzene divinylbenzene) has the specific surface area of 1200-1500 m2/g (Gun'koVMet al. 2008). The thickness of the pore wall is typically smaller than 3 nm (that gives ~99%).





**Fig. S1**. Pore wall thickness distributions for samples 4 and 7 (see Table 4 in the main MS).

a)

b)







**Fig. S2**. DTG curves of the copolymers with kraft lignin (a) and LWL kraft lignin (b).

**Table S1**

Experimental parameters of the synthesis with L kraft lignin, DVB and St-DVB.

| **Copolymer** | **Type of lignin** | **Lignin [wt.%]** | **Styrene [g]** | **DVB**  **[g]** | **Type of solvent** | **Solvent [cm3]** | **AIBN**  **[g]** |
| --- | --- | --- | --- | --- | --- | --- | --- |
| **1L-Met+5DVB** | L-met | 17 | - | 5 | Benzyl alcohol | 14 | 0,090 |
| **2L-Met+5DVB** | L-met | 33 | - | 5 | Benzyl alcohol | 14 | 0,050 |
| **3L-Met+5DVB** | L-met | 50 | - | 5 | Benzyl alcohol | 14 | 0,100 |
| **L-Met+St+DVB** | L-met | 18 | 4 | 5 | Toluene  Decanol | 5  5 | 0,165 |
| **L-unmod+St+DVB** | L-unmod | 18 | 4 | 5 | Toluene  Decanol | 5  5 | 0,165 |
| **2L-unmod+5DVB** | L-unmod | 33 | - | 5 | Benzyl alcohol | 14 | 0,050 |
| **DVB** | - | - | - | 5 | Benzyl alcohol | 10 | 0,050 |
| **St-DVB** | - | - | 4 | 5 | Benzyl alcohol | 10 | 0,090 |

**Table S2**

Experimental parameters of the synthesis with LWL kraft lignin, DVB and St-DVB.

| **Copolymer** | **Type of lignin** | **Lignin [%]** | **Styrene [g]** | **DVB**  **[g]** | **Type of solvent** | **Solvent [cm3]** | **AIBN**  **[g]** |
| --- | --- | --- | --- | --- | --- | --- | --- |
| **1LWL-Met+5DVB** | LWL-Met | 17 | - | 5 | Benzyl alcohol | 14 | 0.060 |
| **2LWL-Met+5DVB** | LWL-Met | 33 | - | 5 | Benzyl alcohol | 14 | 0.100 |
| **3LWL-Met+5DVB** | LWL-Met | 50 | - | 5 | Benzyl alcohol | 14 | 0.080 |
| **LWL-Met+St+DVB** | LWL-Met | 18 | 4 | 5 | Toluene  Decanol | 5  5 | 0.165 |
| **LWL-unmod+St+DVB** | LWL-unmod. | 18 | 4 | 5 | Toluene  Decanol | 5  5 | 0.165 |

**Table S3**

DSC data for the copolymers with kraft lignin, DVB and St-DVB.

| **Copolymer** | **Temperature of degradation [°C]** |
| --- | --- |
| 1L-Met+5DVB | 449.0 |
| 2L-Met+5DVB | 443.8 |
| 3L-Met+5DVB | 429.3 |
| L-Met+St+DVB | 429.5 |
| L-unmod+St+DVB | 434.7 |
| L-unmod+5DVB | 450.6 |
| DVB | 447.2 |
| St-DVB | 426.9 |

**Table S4**

DSC data for the copolymers with LWL kraft lignin.

| **Copolymer** | **Temperature of degradation [°C]** |
| --- | --- |
| 1LWL-Met+5DVB | 444.0 |
| 2LWL-Met+5DVB | 437.5 |
| 3LWL-Met+5DVB | 431.5 |
| LWL-Met+St+DVB | 428.2 |
| LWL-unmod+St+DVB | 436.1 |

**Table S5**

Parameters of the porous structures of the studied copolymers with kraft lignin.

| **COPOLYMER** | **Surface area, SBET**  **[m2/g]** | **Pore volume,**  **VTOT**  **[cm3/g]** | **Average pore diameter**  **[Å]** |
| --- | --- | --- | --- |
| 1L-Met+5DVB | 305 | 0.67 | 90 |
| 2L-Met+5DVB | 8 | 0.01 | 60 |
| 3L-Met+5DVB | 2 | 0.01 | 117 |
| L-Met+St+DVB | 47 | 0.09 | 76 |
| L-unmod+St+DVB | 80 | 0.27 | 137 |
| L-unmod+5DVB | 409 | 0.90 | 88 |
| DVB | 542 | 1.30 | 96 |
| DVB+St | 269 | 0.58 | 86 |

**Table S6**

Parameters of the porous structures of the studied copolymers – LWL kraft lignin.

| **COPOLYMER** | **Surface area, SBET**  **[m2/g]** | **Pore volume,**  **VTOT**  **[cm3/g]** | **Average pore diameter,**  **[Å]** |
| --- | --- | --- | --- |
| 1LWL-Met+5DVB | 236 | 0.250 | 43 |
| 2LWL-Met+5DVB | 0.55 | 0.002 | 175 |
| 3LWL-Met+5DVB | 0.12 | 0.001 | 309 |
| LWL-Met+St+DVB | 59 | 0.120 | 82 |
| LWL-unmod+St+DVB | 168 | 0.700 | 158 |

**Table S7**

Results of the swelling studies.

|  | A | THF | Cl | ACN | Me | T | Aq |
| --- | --- | --- | --- | --- | --- | --- | --- |
| [%] | | | | | | |
| DVB | 27 | 27 | 27 | 17 | 0 | 9 | 0 |
| St+DVB | 54 | 45 | 73 | 17 | 40 | 23 | 0 |
| L-unmod+St+DVB | 40 | 111 | 125 | 78 | 56 | 125 | 0 |
| L-Met+St+DVB | 40 | 117 | 136 | 108 | 91 | 118 | 0 |
| L-unmod+5DVB | 4 | 4 | 4 | 10 | 20 | 5 | 0 |
| 1L-Met+5DVB | 17 | 5 | 12 | 11 | 17 | 24 | 0 |
| 2L-Met+5DVB | 257 | 243 | 186 | 157 | 129 | 171 | 0 |
| 3L-Met+5DVB | 225 | 175 | 200 | 183 | 157 | 163 | 0 |
| LWL-unmod+St+DVB | 54 | 64 | 67 | 89 | 42 | 56 | 0 |
| LWL-Met+St+DVB | 112 | 138 | 150 | 88 | 78 | 122 | 0 |
| 1LWL-Met+5DVB | 167 | 120 | 89 | 122 | 133 | 171 | 0 |
| 2LWL-Met+5DVB | 186 | 250 | 186 | 122 | 50 | 122 | 0 |
| 3LWL-Met+5DVB | 171 | 386 | 243 | 100 | 33 | 83 | 0 |

A-acetone, THF-tetrahydrofurane, Cl-chloroform, ACN-acetonitryle, Me-methanol T-toluene, Aq- aqua dest.

**References**

Gun'koVM (2014) Composite materials: textural characteristics. Applied Surface Sci307:444–454.

Gun'koVM, DoDD (2001) Characterization of pore structure of carbon adsorbents using regularization procedure. Colloids Surf A: Physicochem Eng Aspects 193:71– 83.

Gun'koVM, TurovVV, ZarkoVI, NychiporukYM, GoncharukEV, PakhlovEM, YurchenkoGR, KulikTV, PalyanytsyaBB,BorodavkaTV, KrupskayaTV, LebodaR, Skubiszewska-ZiębaJ, OsovskiiVD, PtushinskiiYG, TurovAV (2008) Structural features of polymer adsorbent LiChrolut EN and interfacial behavior of water and water-organic mixtures. J Colloid Interface Sci 323:6–17.

NguyenC, DoDD (1999) A new method for the characterization of porous materials, Langmuir 15:3608-3615.

ProvencherSW (1982) A constrained regularization method for inverting data represented by linear algebraic or integral equations.Comp Phys Comm 27:213-227.
